# Supplementary material for: Convergence of inputs from the basal ganglia with layer 5 of motor cortex and cerebellum in mouse motor thalamus
Source: eLife. 2024 Jun 10;13:e97489. doi: 10.7554/eLife.97489 (PMC11208046; doi:10.7554/eLife.97489)
Supplement: Figure 1—source data 1. [file elife-97489-fig1-data1.xlsx]

## Sheet: Figure 1F source data
Identification	Amplitude (mV)
Cell #1	1.79827
Cell #2	1.21276
Cell #3	1.47291
Cell #4	0.892644

## Sheet: Figure 1G source data
Identification	paired-pulse ratio (2nd EPSP/1st EPSP)
Cell #1	0.714179
Cell #2	0.943146
Cell #3	0.638569
Cell #4	0.531363
