# Supplementary material for: Convergence of inputs from the basal ganglia with layer 5 of motor cortex and cerebellum in mouse motor thalamus
Source: eLife. 2024 Jun 10;13:e97489. doi: 10.7554/eLife.97489 (PMC11208046; doi:10.7554/eLife.97489)
Supplement: Figure 2—source data 1. [file elife-97489-fig2-data1.xlsx]

## Sheet: Sheet1
		-0.8 convergence values	-1.0 convergence values
M1L5 + GPi	animal #1	2.66101	14.2413
	animal #2	3.33805	5.75187
	animal #3	20.1623	10.8818
Cb + GPi	animal #1	6.59725	17.5771
	animal #2	8.31783	18.6263
	animal #3	7.57558	22.5177
M1L5 + Cb	animal #1	0.804577	1.40493
	animal #2	9.24535	1.26684
	animal #3	1.04748	1.02163
M1L5 + GPi + Cb	animal #1	2.92634	3.34706
	animal #2	0.818826	0.535761
	animal #3	1.0484	0.144318
