# Supplementary material for: Convergence of inputs from the basal ganglia with layer 5 of motor cortex and cerebellum in mouse motor thalamus
Source: eLife. 2024 Jun 10;13:e97489. doi: 10.7554/eLife.97489 (PMC11208046; doi:10.7554/eLife.97489)
Supplement: Figure 4—source data 1. [file elife-97489-fig4-data1.xlsx]

## Sheet: Sheet1
		-0.8 convergence values	-1.0 convergence values
M1L5 + SNr	animal #1	24.286	19.1003
	animal #2	10.222	22.3149
Cb + SNr	animal #1	0.073166	0.142418
	animal #2	1.7978	1.0001
M1L5 + Cb	animal #1	2.53926	4.79801
	animal #2	9.0032	3.92394
M1L5 + SNr + Cb	animal #1	0.024773	0.023727
	animal #2	0.557066	0.022604
