# Supplementary material for: Convergence of inputs from the basal ganglia with layer 5 of motor cortex and cerebellum in mouse motor thalamus
Source: eLife. 2024 Jun 10;13:e97489. doi: 10.7554/eLife.97489 (PMC11208046; doi:10.7554/eLife.97489)
Supplement: Figure 6—source data 1. [file elife-97489-fig6-data1.xlsx]

## Sheet: Sheet1
		M1L5 values			Cb values
		Amplitude of first EPSC (pA)	PPR		Amplitude of first EPSC (pA)	PPR
	Cell #1	54.4777	0.75047		70.5357	0.601168
	Cell #2	15.114	0.835384		19.0256	0.456421
	Cell #3	13.298	0.34757		742.783	0.637483
	Cell #4	17.3282	0.830912		23.0257	0.692439
	Cell #5	16.3529	0.641605		545.772	0.855626
	Cell #6	36.1873	0.735469		200.788	0.883244
	Cell #7	48.2131	0.604929		142.052	0.740417
	Cell #8	16.5424	0.677919		10.6297	0.908107
	Cell #9	17.0053	0.537778		30.9914	0.250087
	Cell #10	35.9677	0.522023		10.9418	0.607202
	Cell #11	37.5974	0.217848		572.868	0.713798
	Cell #12	30.8386	0.68167		59.6097	0.482911
	Cell #13	49.6857	0.512279		177.971	0.839918
	Cell #14	154.293	0.755631		274.543	0.699357
	Cell #15	72.3604	0.754626		111.858	0.666418
	Cell #16				97.6898	0.798353
	Cell #17				1227.56	0.311129
	Cell #18				79.5501	0.643426
	Cell #19				36.6603	0.542059
	Cell #20				37.901	0.761366
	Cell #21				70.6698	0.38864
	Cell #22				216.374	0.697535
	Cell #23				114.716	0.203076
	Cell #24				141.929	0.663825
	Cell #25				49.887	0.814877
	Cell #26				64.4489	0.869488
	Cell #27				488.597	0.514377
	Cell #28				574.051	0.8172
	Cell #29				161.928	0.541544
	Cell #30				185.335	0.715395
