# Supplementary material for: Convergence of inputs from the basal ganglia with layer 5 of motor cortex and cerebellum in mouse motor thalamus
Source: eLife. 2024 Jun 10;13:e97489. doi: 10.7554/eLife.97489 (PMC11208046; doi:10.7554/eLife.97489)
Supplement: Figure 7—source data 1. [file elife-97489-fig7-data1.xlsx]

## Sheet: Figure 7C
	Average terminal size
	within	outside
animal #1	2.6311	2.94108
animal #2	2.20936	2.30963
animal #3	2.41895	3.21656
animal #4	2.68998	3.98426
animal #5	2.71482	2.68647

## Sheet: Figure 7D
	Average number of terminals in ROI
	within	outside
animal #1	187	625
animal #2	238.5	239
animal #3	355	561
animal #4	205	618
animal #5	130	251
